# Supplementary material for: Highly pathogenic avian influenza A(H5N1) virus in a common bottlenose dolphin (Tursiops truncatus) in Florida
Source: PubMed Central journal article supplement (PMC11026403; doi:10.1038/s42003-024-06173-x), 2024-04-18
Supplement: 42003_2024_6173_MOESM2_ESM.pdf [file 42003_2024_6173_MOESM2_ESM.pdf]

# PB2

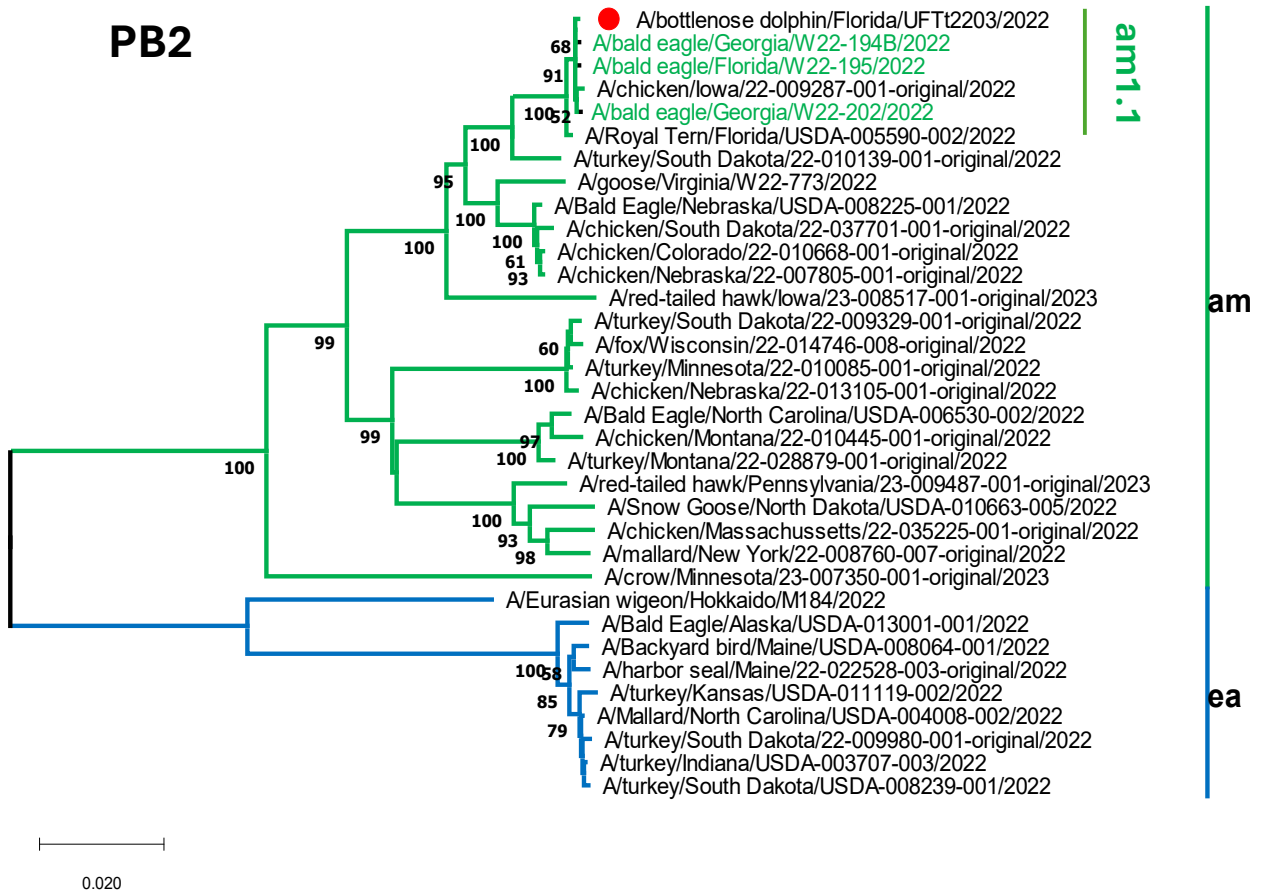

# PB1

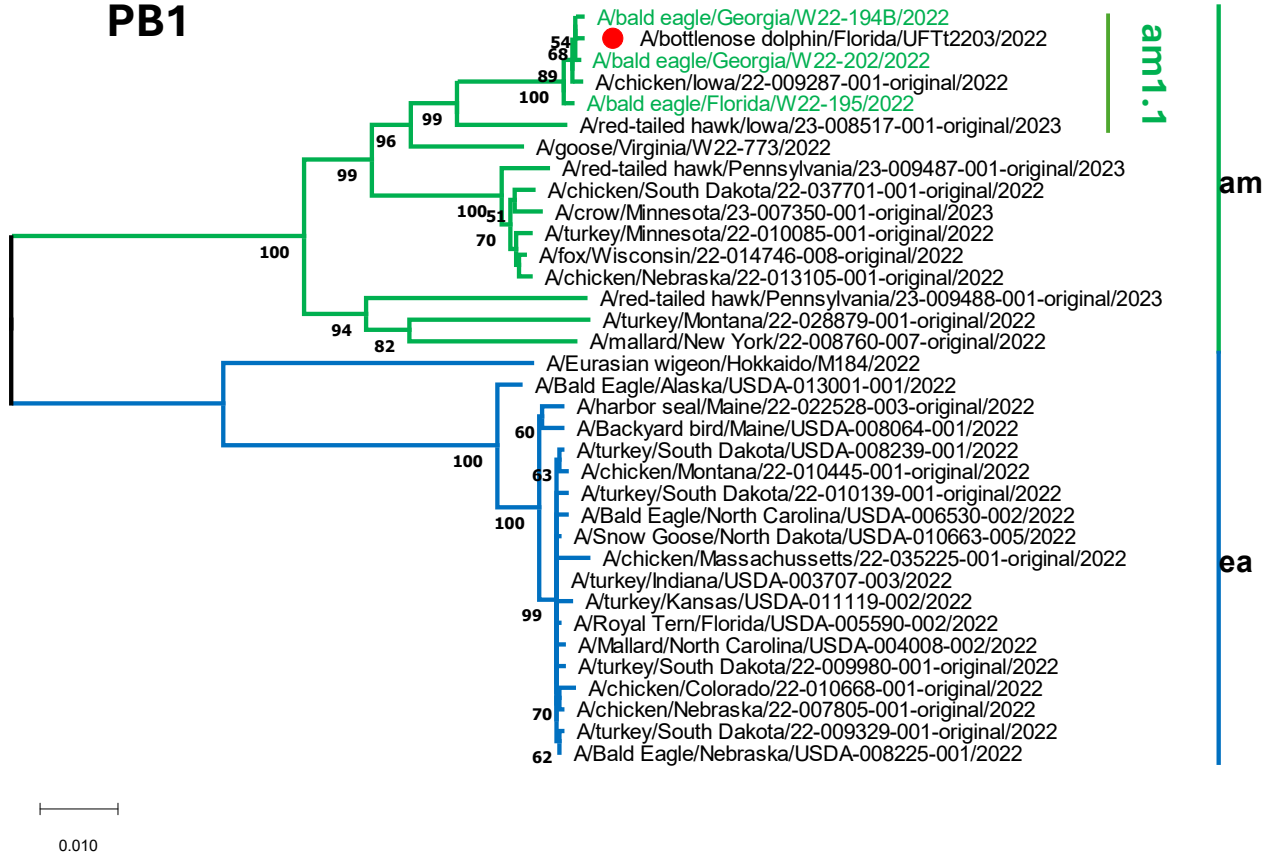

PA

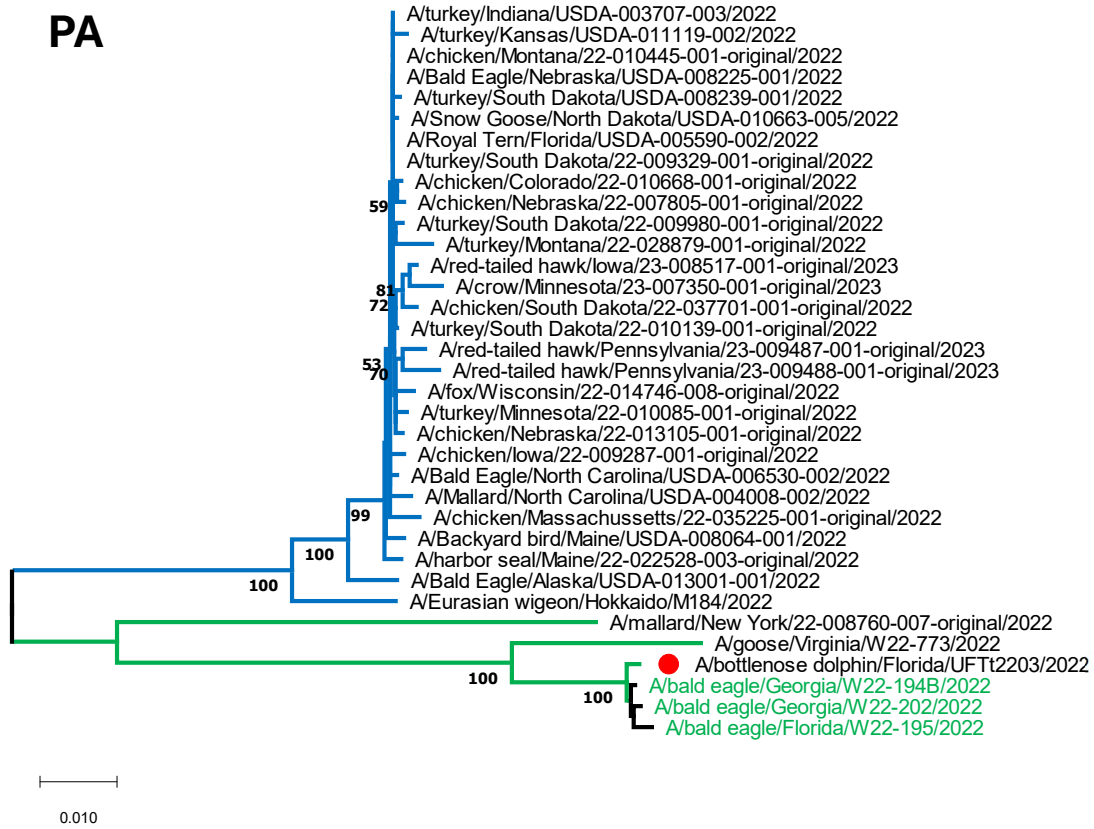

ea

am1

am

HA

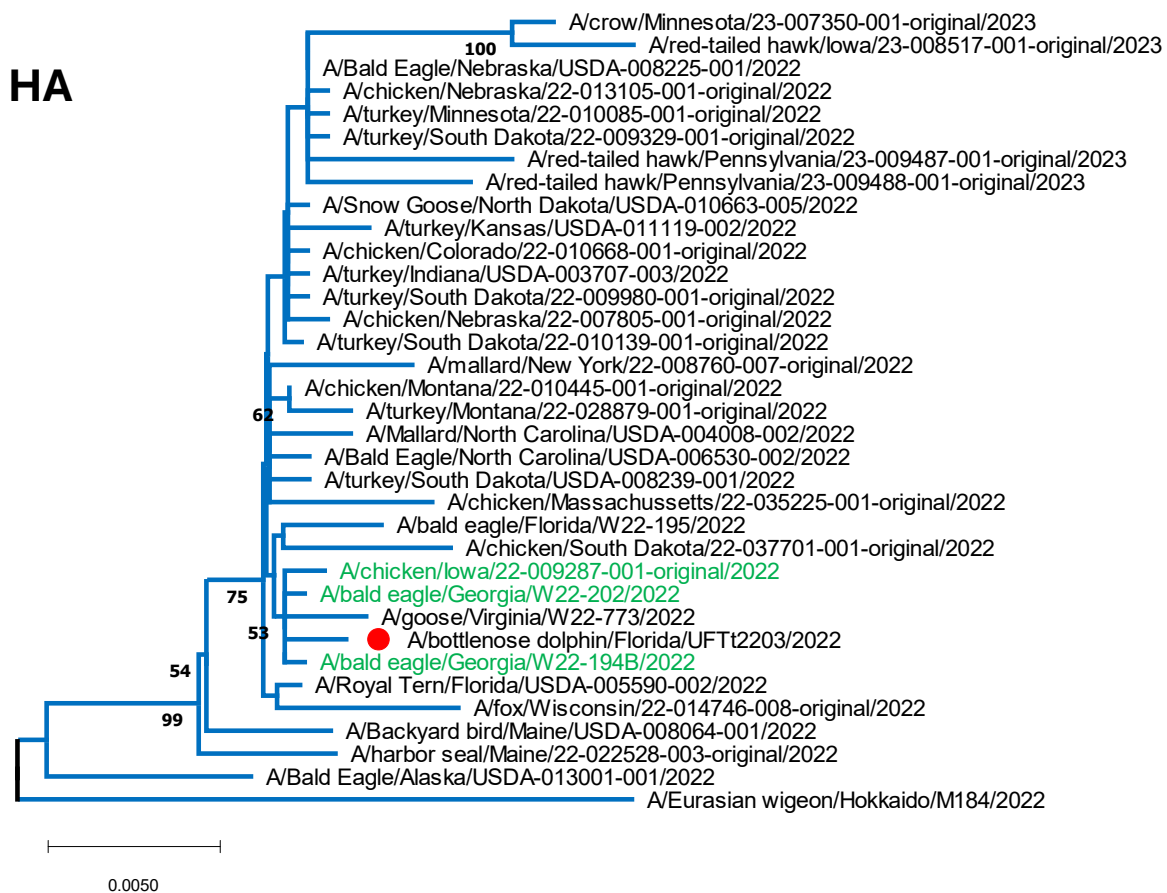

ea1

ea

0.0050

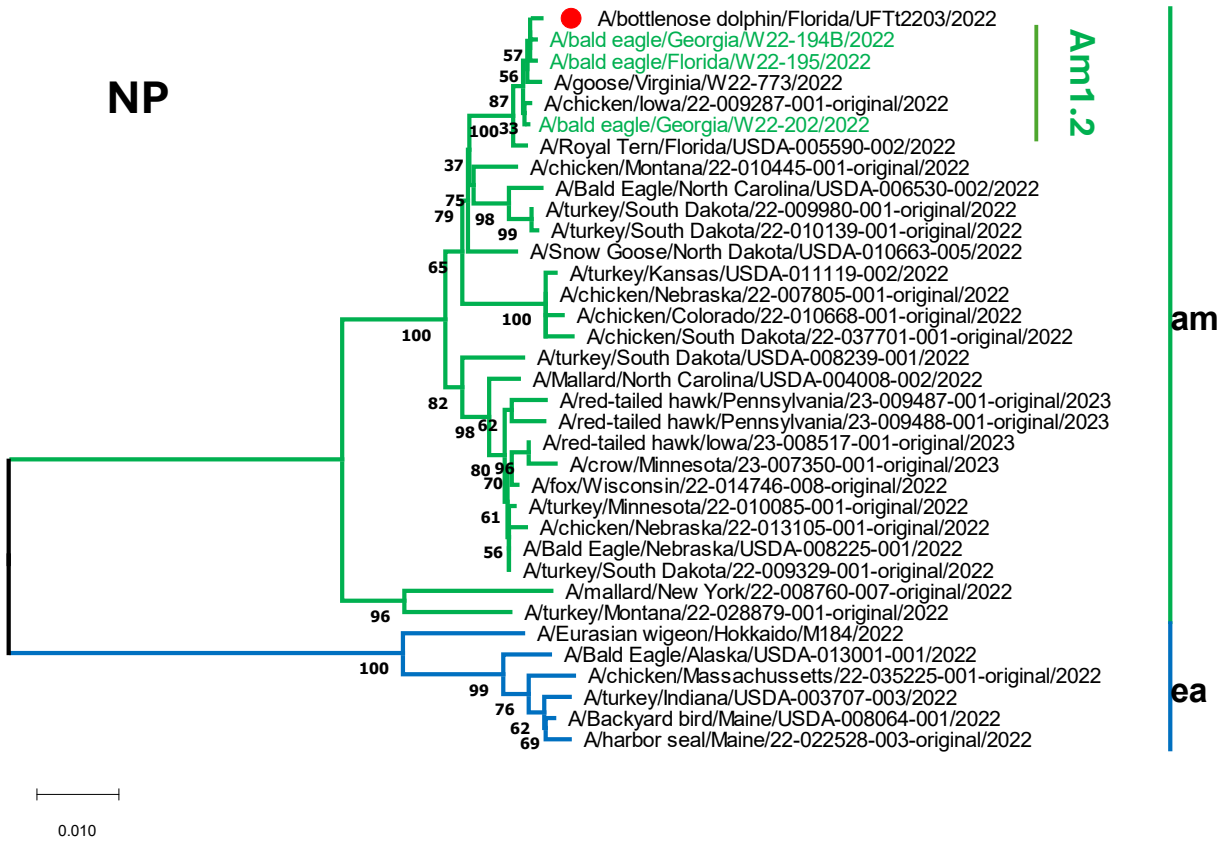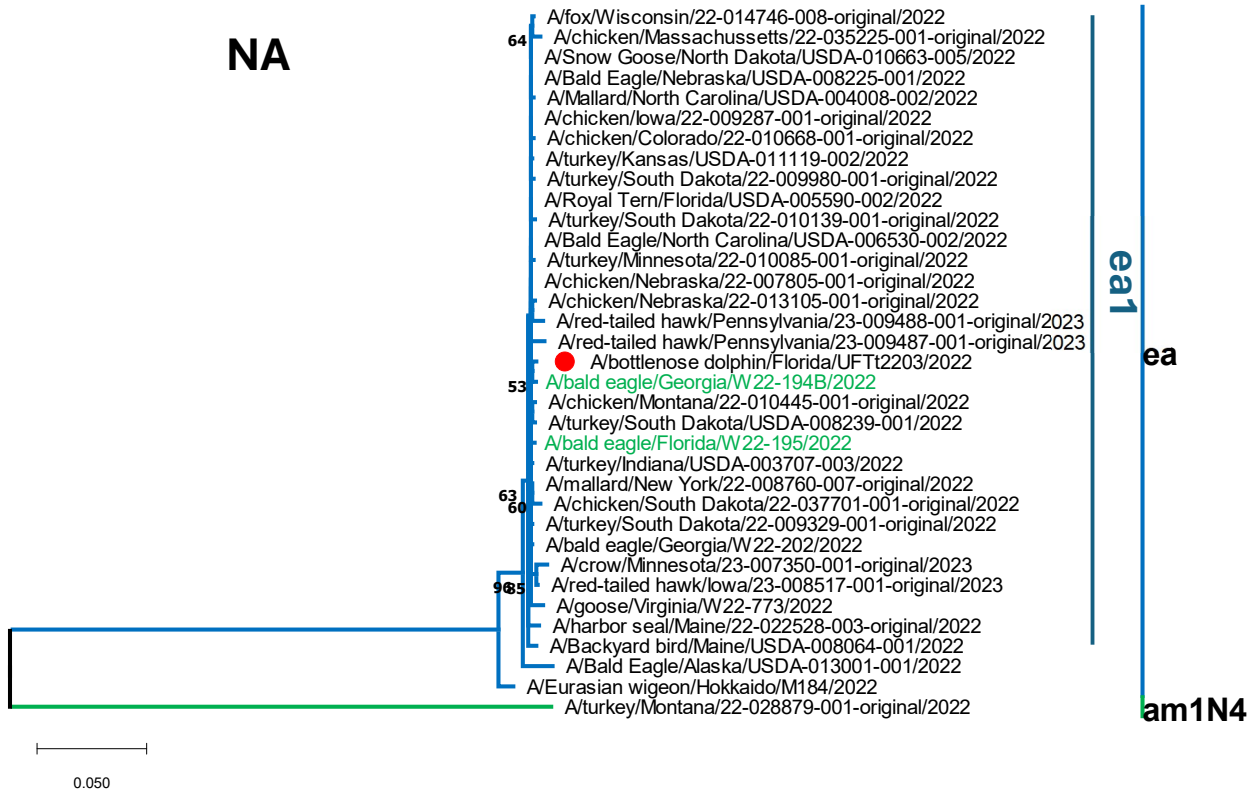

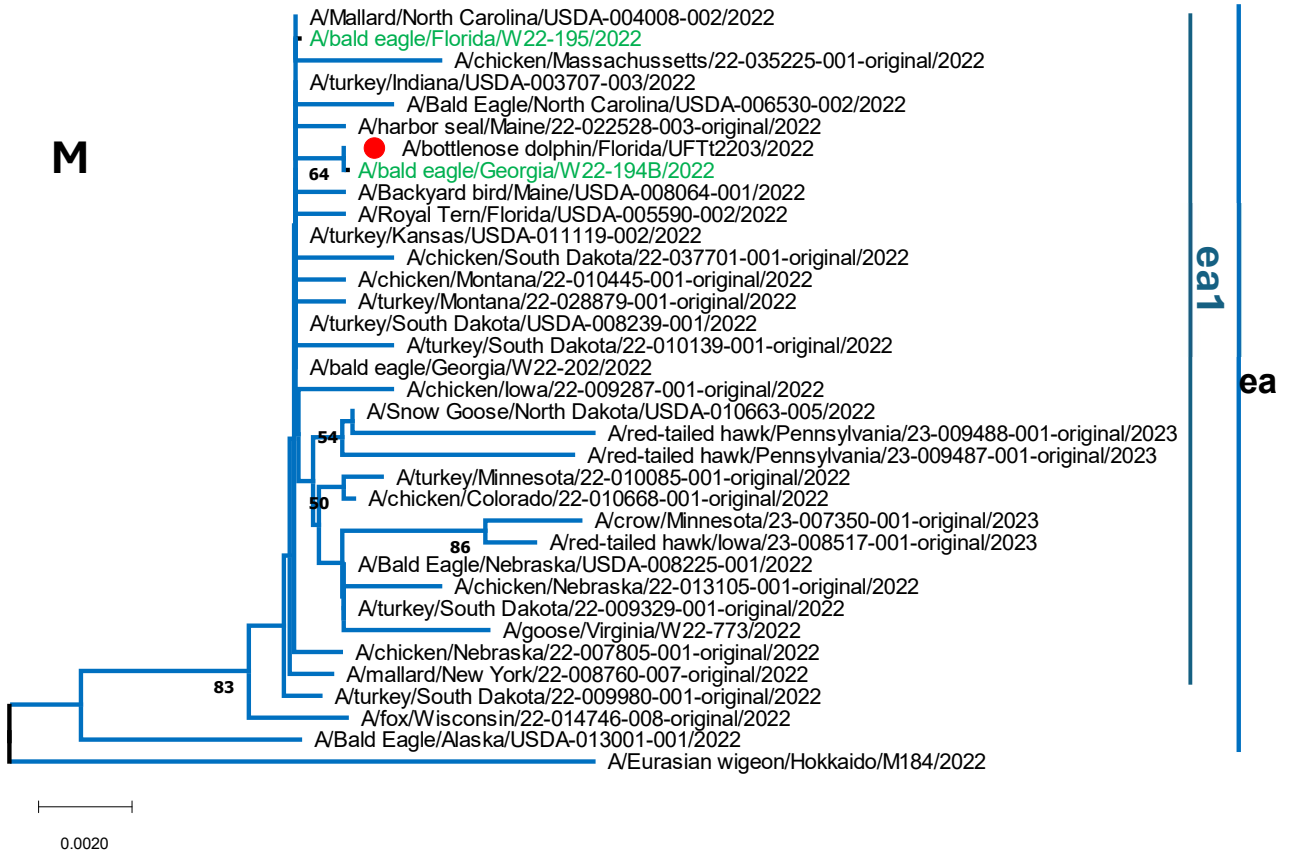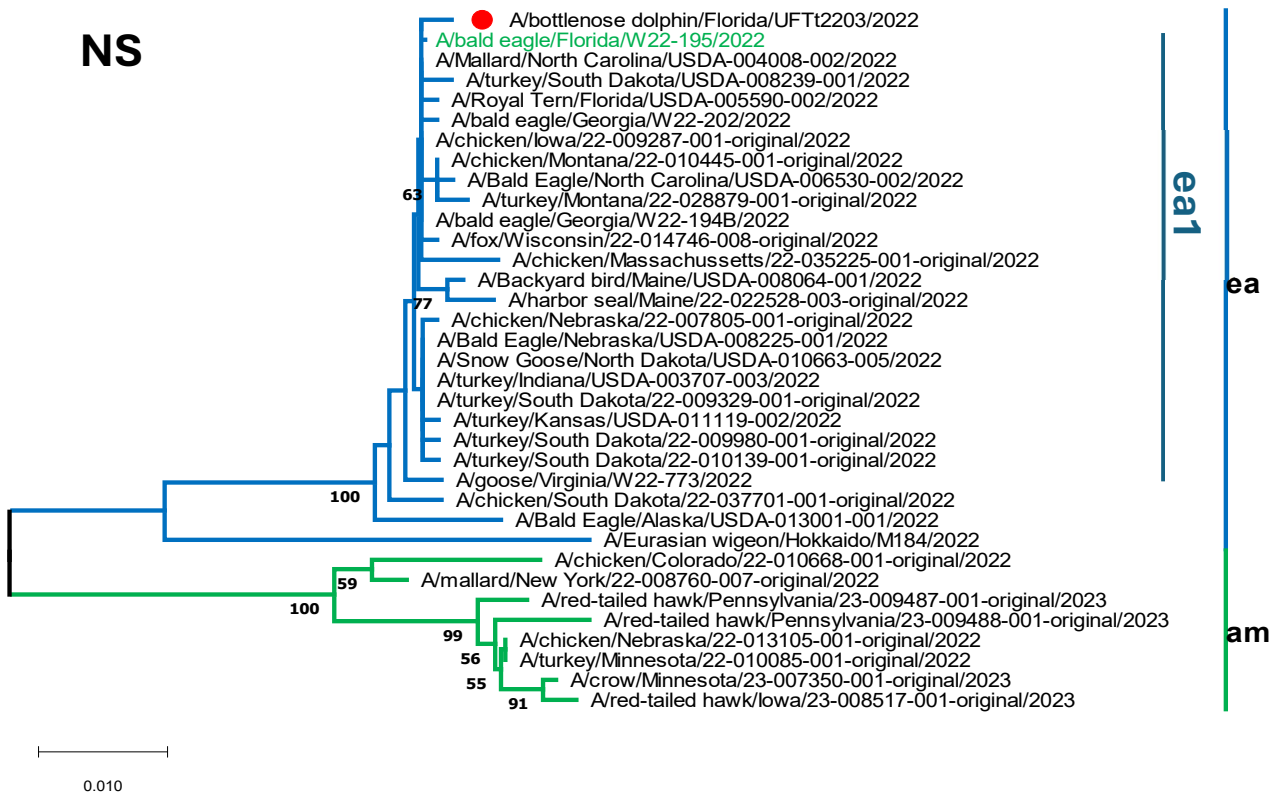

**Fig. S1. Phylogenetic trees of eight gene segments of A/bottlenose**

**dolphin/Florida/UFTt2203/2022 (H5N1).** A/bottlenose dolphin/Florida/UFTt2203/2022 is indicated by the red circle and viruses with the highest sequence identity to this virus are in green font. am represents North American gene lineages, colored green; and ea representing Eurasian gene lineage are colored blue. The genetic clade to which A/bottlenose dolphin/Florida/UFTt2203/2022 belongs to is identified to the right. Numbers at nodes represent bootstrap percentages.

**Table S1.** GISAID Acknowledgement table. All sequences downloaded from GISAID utilized for phylogenetic analysis are represented and ordered by the GISAID Isolate ID number and including strain name, gene segment IDs and sequence authors.

| We gratefully acknowledge the authors, originating and submitting laboratories of the sequences from GISAID's EpiFlu™ Database on which this research is based. The list is detailed below. |                                                         |                                                                                                         |                                                                                                                                                                                                         |
|---------------------------------------------------------------------------------------------------------------------------------------------------------------------------------------------|---------------------------------------------------------|---------------------------------------------------------------------------------------------------------|---------------------------------------------------------------------------------------------------------------------------------------------------------------------------------------------------------|
| Isolate-ID                                                                                                                                                                                  | Isolate name                                            | Segment IDs                                                                                             | Authors                                                                                                                                                                                                 |
| EPI_ISL_18133097                                                                                                                                                                            | A/Backyard<br>bird/Maine/USDA008064-<br>001/2022        | EPI2709682, EPI2709685,<br>EPI2709688, EPI2709691,<br>EPI2709694, EPI2709697,<br>EPI2709670, EPI2709673 | Youk,S., Torchetti,M.K., Lantz,K.,<br>Lenoch,J.B., Killian,M.L., Leyson,C.,<br>Bevins,S.N., Dilione,K., Ip,H.S.,<br>Stallknecht,D.E., Poulson,R.L.,<br>Suarez,D.L., Swayne,D.E.;<br>PantinJackwood,M.J. |
| EPI_ISL_18132957                                                                                                                                                                            | A/Bald<br>Eagle/Alaska/USDA013001-<br>001/2022          | EPI2708558, EPI2708572,<br>EPI2708545, EPI2708547,<br>EPI2708556, EPI2708565,<br>EPI2708567, EPI2708570 | Youk,S., Torchetti,M.K., Lantz,K.,<br>Lenoch,J.B., Killian,M.L., Leyson,C.,<br>Bevins,S.N., Dilione,K., Ip,H.S.,<br>Stallknecht,D.E., Poulson,R.L.,<br>Suarez,D.L., Swayne,D.E.;<br>PantinJackwood,M.J. |
| EPI_ISL_14937070                                                                                                                                                                            | A/bald<br>eagle/Florida/W22195/2022                     | EPI2176439, EPI2176440,<br>EPI2176441, EPI2176442,<br>EPI2176443, EPI2176444,<br>EPI2176445, EPI2176446 | Poulson,R.; Stallknecht,D.; Rubrum,A.;<br>Jeevan,T.; Walker,D.; Webby,R.                                                                                                                                |
| EPI_ISL_14937002                                                                                                                                                                            | A/bald<br>eagle/Georgia/W22194B/2022                    | EPI2176424, EPI2176425,<br>EPI2176426, EPI2176427,<br>EPI2176428, EPI2176429,<br>EPI2176430, EPI2176431 | Poulson,R.; Stallknecht,D.; Rubrum,A.;<br>Jeevan,T.; Walker,D.; Webby,R.                                                                                                                                |
| EPI_ISL_14937071                                                                                                                                                                            | A/bald<br>eagle/Georgia/W22202/2022                     | EPI2176449, EPI2176450,<br>EPI2176451, EPI2176452,<br>EPI2176453, EPI2176454,<br>EPI2176447, EPI2176448 | Poulson,R.; Stallknecht,D.; Rubrum,A.;<br>Jeevan,T.; Walker,D.; Webby,R.                                                                                                                                |
| EPI_ISL_18132909                                                                                                                                                                            | A/Bald<br>Eagle/Nebraska/USDA008225-<br>001/2022        | EPI2708180, EPI2708182,<br>EPI2708187, EPI2708190,<br>EPI2708194, EPI2708197,<br>EPI2708168, EPI2708172 | Youk,S., Torchetti,M.K., Lantz,K.,<br>Lenoch,J.B., Killian,M.L., Leyson,C.,<br>Bevins,S.N., Dilione,K., Ip,H.S.,<br>Stallknecht,D.E., Poulson,R.L.,<br>Suarez,D.L., Swayne,D.E.;<br>PantinJackwood,M.J. |
| EPI_ISL_18132885                                                                                                                                                                            | A/Bald Eagle/North<br>Carolina/USDA-006530-<br>002/2022 | EPI2707988, EPI2707990,<br>EPI2707994, EPI2707997,<br>EPI2707999, EPI2708004,<br>EPI2707979, EPI2707981 | Youk,S., Torchetti,M.K., Lantz,K.,<br>Lenoch,J.B., Killian,M.L., Leyson,C.,<br>Bevins,S.N., Dilione,K., Ip,H.S.,<br>Stallknecht,D.E., Poulson,R.L.,<br>Suarez,D.L., Swayne,D.E.;<br>PantinJackwood,M.J. |

|                  |                                                     |                                                                                                |                                                                                                                          |
|------------------|-----------------------------------------------------|------------------------------------------------------------------------------------------------|--------------------------------------------------------------------------------------------------------------------------|
| EPI_ISL_15004062 | A/chicken/Colorado/22-010668-001-original/2022      | EPI2179297, EPI2179298, EPI2179293, EPI2179294, EPI2179295, EPI2179299, EPI2179300, EPI2179296 | Chinh,Thanh;Franzen,Kerrie;Love,Emily;Killian,Mary;Koster,Leo;Lantz,Kristina;Stuber,Tod;Hicks,Jessica                    |
| EPI_ISL_12690589 | A/chicken/Iowa/22-009287001-original/2022           | EPI2035074, EPI2035075, EPI2035078, EPI2035079, EPI2035080, EPI2035076, EPI2035077, EPI2035081 | Chinh,Thanh;Franzen,Kerrie;Love,Emily;Killian,Mary;Koster,Leo;Lantz,Kristina;Stuber,Tod;Hicks,Jessica                    |
| EPI_ISL_16297079 | A/chicken/Massachusetts/22-035225-001-original/2022 | EPI2263542, EPI2263543, EPI2263544, EPI2263539, EPI2263540, EPI2263541, EPI2263545, EPI2263546 | Chinh,Thanh;Love,Emily;Franzen,Kerrie;Killian,Mary;Koster,Leo;Lantz,Kristina;Stuber,Tod;Hicks,Jessica                    |
| EPI_ISL_13434407 | A/chicken/Montana/22-010445-001-original/2022       | EPI2074910, EPI2074911, EPI2074912, EPI2074913, EPI2074914, EPI2074915, EPI2074916, EPI2074909 | Chinh,Thanh;Love,Emily;Franzen,Kerrie;Killian,Mary;Koster,Leo;Lantz,Kristina;Stuber,Tod;Hicks,Jessica                    |
| EPI_ISL_11897695 | A/chicken/Nebraska/22-007805-001-original/2022      | EPI2014121, EPI2014118, EPI2014119, EPI2014120, EPI2014122, EPI2014123, EPI2014124, EPI2014125 | Chinh,Thanh;Love,Emily;Franzen,Kerrie;Killian,Mary;Koster,Leo;Lantz,Kristina;Stuber,Tod;Hicks,Jessica                    |
| EPI_ISL_16171473 | A/chicken/Nebraska/22-013105-001-original/2022      | EPI2246420, EPI2246421, EPI2246422, EPI2246417, EPI2246418, EPI2246419, EPI2246423, EPI2246424 | Chinh,Thanh;Love,Emily;Franzen,Kerrie;Killian,Mary;Koster,Leo;Lantz,Kristina;Stuber,Tod;Hicks,Jessica                    |
| EPI_ISL_16271839 | A/chicken/South Dakota/22037701-001-original/2022   | EPI2260658, EPI2260659, EPI2260660, EPI2260655, EPI2260656, EPI2260657, EPI2260661, EPI2260662 | Chinh,Thanh;Love,Emily;Franzen,Kerrie;Killian,Mary;Koster,Leo;Lantz,Kristina;Stuber,Tod;Hicks,Jessica                    |
| EPI_ISL_17964888 | A/crow/Minnesota/23-007350-001-original/2023        | EPI2613879, EPI2613880, EPI2613881, EPI2613882, EPI2613883, EPI2613884, EPI2613885, EPI2613886 | Chinh,Thanh;Franzen,Kerrie;Love,Emily;Ozella,Mikaela;Killian,Mary;Lantz,Kristina;Stuber,Tod;Hicks,Jessica;Norris,Cameron |
| EPI_ISL_15732766 | A/Eurasian wigeon/Hokkaido/M184/2022                | EPI2213710, EPI2213711, EPI2213709, EPI2213713, EPI2213706, EPI2213708, EPI2213712, EPI2213707 | Yoshihiro,SAKODA; Kohei,OGASAWARA; Norikazu,ISODA; Takahiro,HIONO                                                        |
| EPI_ISL_15078246 | A/fox/Wisconsin/22-014746008-original/2022          | EPI2182068, EPI2182069, EPI2182064, EPI2182065, EPI2182066, EPI2182067, EPI2182070, EPI2182071 | Chinh,Thanh;Love,Emily;Franzen,Kerrie;Killian,Mary;Koster,Leo;Lantz,Kristina;Stuber,Tod;Hicks,Jessica                    |
| EPI_ISL_17424653 | A/goose/Virginia/W22773/2022                        | EPI2507060, EPI2507061, EPI2507065, EPI2507063, EPI2507057, EPI2507059, EPI2507062, EPI2507064 | Poulson,R.; Stallknecht,D.; Rubrum,A.; Jeevan,T.; Walker,D.; Webby,R.                                                    |

|                  |                                                 |                                                 |                                                                                                        |
|------------------|-------------------------------------------------|-------------------------------------------------|--------------------------------------------------------------------------------------------------------|
| EPI_ISL_16632539 | A/harbor seal/Maine/22-022528-003-original/2022 | EPI2310413, EPI2310414, EPI2310415, EPI2310416, | Chinh,Thanh; Franzen,Kerrie; Love,Emily; Killian,Mary; Lantz,Kristina; Hicks,Jessica; Norris, Cameron; |
|                  |                                                 | EPI2310419, EPI2310420, EPI2310417, EPI2310418  | Stuber,Tod; Sawatzki, Kaitlin; Puryear, Wendy; Foss, Alexa; Doughty,Linda; Runstadler, Jonathan        |
