# Supplementary material for: Highly pathogenic avian influenza A(H5N1) virus in a common bottlenose dolphin (Tursiops truncatus) in Florida
Source: PubMed Central journal article supplement (PMC11026403; doi:10.1038/s42003-024-06173-x), 2024-04-18
Supplement: 42003_2024_6173_MOESM3_ESM.pdf [file 42003_2024_6173_MOESM3_ESM.pdf]

## Description of Additional Supplementary Files

**File name:** Supplementary Data

**Description:** Source data files containing individual data points for figure 4 and 5
