# Supplementary material for: Highly pathogenic avian influenza A(H5N1) virus in a common bottlenose dolphin (Tursiops truncatus) in Florida
Source: PubMed Central journal article supplement (PMC11026403; doi:10.1038/s42003-024-06173-x), 2024-04-18
Supplement: 42003_2024_6173_MOESM4_ESM.pdf [file 42003_2024_6173_MOESM4_ESM.pdf]

**Figure 4**

|                                                            |                        | RFU from NA-cleaved MUNANA Substrate |         |         |         |           |         |         |         |           |         |         |         |
|------------------------------------------------------------|------------------------|--------------------------------------|---------|---------|---------|-----------|---------|---------|---------|-----------|---------|---------|---------|
|                                                            |                        | Oseltamivir Carboxylate              |         |         |         | Zanamivir |         |         |         | Peramivir |         |         |         |
| Strain                                                     | NAI Concentration (µM) | Curve 1                              | Curve 2 | Curve 3 | Curve 4 | Curve 1   | Curve 2 | Curve 3 | Curve 4 | Curve 1   | Curve 2 | Curve 3 | Curve 4 |
| <b>A/Denmark/524/2009</b>                                  | 50                     | 1445                                 | 1572    | 1348    | 1422    | 1478      | 1506    | 1406    | 1472    | 1545      | 1576    | 1456    | 1460    |
|                                                            | 5                      | 1442                                 | 1606    | 1414    | 1503    | 1480      | 1533    | 1486    | 1495    | 1549      | 1602    | 1580    | 1453    |
|                                                            | 0.5                    | 1611                                 | 1651    | 1516    | 1537    | 1503      | 1556    | 1475    | 1407    | 1553      | 1577    | 1498    | 1493    |
|                                                            | 0.05                   | 2183                                 | 2264    | 1866    | 1985    | 1814      | 1796    | 1724    | 1760    | 1582      | 1603    | 1518    | 1550    |
|                                                            | 0.005                  | 6885                                 | 6937    | 4437    | 5026    | 3901      | 3717    | 3557    | 3162    | 1810      | 1954    | 1669    | 1636    |
|                                                            | 0.0005                 | 24168                                | 24511   | 15420   | 14924   | 14804     | 13510   | 10714   | 11719   | 3738      | 4862    | 3102    | 3164    |
|                                                            | 0.00005                | 43565                                | 44707   | 31646   | 31822   | 33805     | 33491   | 34073   | 33696   | 36098     | 37193   | 27280   | 27866   |
|                                                            | 0.000005               | 46986                                | 47540   | 37312   | 37286   | 36791     | 36463   | ND      | 37274   | 44423     | 46028   | 34629   | 35079   |
|                                                            | 0.0000005              | 46078                                | 47893   | 38361   | 38598   | 32779     | 36808   | 35027   | 36054   | 47151     | 46183   | 36048   | 36083   |
|                                                            | 0.00000005             | 46847                                | 45788   | 37282   | 35588   | 36166     | 33021   | 36962   | 35668   | 45306     | 45624   | 35633   | 35021   |
| <b>A/Denmark/528/2009</b>                                  | 50                     | 1742                                 | 1739    | 1651    | 1519    | 1517      | 1508    | 1475    | 1500    | 1620      | 1637    | 1490    | 1468    |
|                                                            | 5                      | 3251                                 | 3181    | 2638    | 2827    | 1526      | 1471    | 1446    | 1392    | 1857      | 1868    | 1583    | 1620    |
|                                                            | 0.5                    | 14010                                | 14053   | 10546   | 10749   | 1539      | 1489    | 1406    | 1476    | 4304      | 4254    | 3173    | 3084    |
|                                                            | 0.05                   | 37810                                | 37232   | 31124   | 31213   | 1803      | 1760    | 1680    | 1756    | 18697     | 17479   | 13514   | 12391   |
|                                                            | 0.005                  | 45073                                | 44715   | 38746   | 36575   | 3672      | 3868    | 3807    | 3641    | 41913     | 40663   | 32905   | 29883   |
|                                                            | 0.0005                 | 45522                                | 48171   | 40874   | 40947   | 17743     | 17323   | 15222   | 15581   | 48831     | 47945   | 39059   | 37999   |
|                                                            | 0.00005                | 46408                                | 49559   | 41788   | 42237   | 35210     | 31610   | 37481   | 37984   | 46668     | 48699   | 39090   | 40101   |
|                                                            | 0.000005               | 50971                                | 51503   | 43909   | 43200   | 39184     | 39130   | 41637   | 42750   | 49483     | 49521   | 37869   | 41065   |
|                                                            | 0.0000005              | 51072                                | 48705   | 42199   | 43058   | 39249     | 38590   | 43034   | 42794   | 49834     | 47200   | 41748   | 41268   |
|                                                            | 0.00000005             | 48989                                | 48568   | 41491   | 42429   | 38826     | 37886   | 43409   | 41900   | 44875     | 46590   | 40485   | 42269   |
| <b>A/common bottlenose dolphin/Florida/UFTt2203br/2022</b> | 50                     | 1742                                 | 1739    | 1651    | 1519    | 1517      | 1508    | 1475    | 1500    | 1620      | 1637    | 1490    | 1468    |
|                                                            | 5                      | 3251                                 | 3181    | 2638    | 2827    | 1526      | 1471    | 1446    | 1392    | 1857      | 1868    | 1583    | 1620    |
|                                                            | 0.5                    | 14010                                | 14053   | 10546   | 10749   | 1539      | 1489    | 1406    | 1476    | 4304      | 4254    | 3173    | 3084    |
|                                                            | 0.05                   | 37810                                | 37232   | 31124   | 31213   | 1803      | 1760    | 1680    | 1756    | 18697     | 17479   | 13514   | 12391   |
|                                                            | 0.005                  | 45073                                | 44715   | 38746   | 36575   | 3672      | 3868    | 3807    | 3641    | 41913     | 40663   | 32905   | 29883   |
|                                                            | 0.0005                 | 45522                                | 48171   | 40874   | 40947   | 17743     | 17323   | 15222   | 15581   | 48831     | 47945   | 39059   | 37999   |
|                                                            | 0.00005                | 46408                                | 49559   | 41788   | 42237   | 35210     | 31610   | 37481   | 37984   | 46668     | 48699   | 39090   | 40101   |
|                                                            | 0.000005               | 50971                                | 51503   | 43909   | 43200   | 39184     | 39130   | 41637   | 42750   | 49483     | 49521   | 37869   | 41065   |
|                                                            | 0.0000005              | 51072                                | 48705   | 42199   | 43058   | 39249     | 38590   | 43034   | 42794   | 49834     | 47200   | 41748   | 41268   |
|                                                            | 0.00000005             | 48989                                | 48568   | 41491   | 42429   | 38826     | 37886   | 43409   | 41900   | 44875     | 46590   | 40485   | 42269   |

**Figure 5**

| <b>A/common bottlenose dolphin/Florida/UFTt2203br/2022</b> |  | <b>3'-SLN Ligand</b> |                    | <b>6'-SLN Ligand</b> |                    |
|------------------------------------------------------------|--|----------------------|--------------------|----------------------|--------------------|
| <b>Polymer Concentration (µg)</b>                          |  | <b>Replicate 1</b>   | <b>Replicate 2</b> | <b>Replicate 1</b>   | <b>Replicate 2</b> |
| 0.15625                                                    |  | 0.1                  | 0.094              | 0.086                | 0.119              |
| 0.3125                                                     |  | 0.125                | 0.134              | 0.08                 | 0.08               |
| 0.625                                                      |  | 0.198                | 0.19               | 0.08                 | 0.085              |
| 1.25                                                       |  | 0.342                | 0.336              | 0.081                | 0.081              |
| 2.5                                                        |  | 0.551                | 0.546              | 0.088                | 0.088              |
| 5                                                          |  | 0.755                | 0.743              | 0.1                  | 0.092              |
| 10                                                         |  | 0.923                | 0.908              | 0.116                | 0.105              |
| <b>A/bald eagle/Florida/W22-134-OP/2022</b>                |  | <b>3'-SLN Ligand</b> |                    | <b>6'-SLN Ligand</b> |                    |
| <b>Polymer Concentration (µg)</b>                          |  | <b>Replicate 1</b>   | <b>Replicate 2</b> | <b>Replicate 1</b>   | <b>Replicate 2</b> |
| 0.15625                                                    |  | 0.16                 | 0.164              | 0.113                | 0.12               |
| 0.3125                                                     |  | 0.271                | 0.299              | 0.108                | 0.111              |
| 0.625                                                      |  | 0.473                | 0.499              | 0.117                | 0.116              |
| 1.25                                                       |  | 0.708                | 0.739              | 0.128                | 0.13               |
| 2.5                                                        |  | 0.885                | 0.857              | 0.142                | 0.147              |
| 5                                                          |  | 0.971                | 0.989              | 0.175                | 0.189              |
| 10                                                         |  | 1.048                | 0.987              | 0.279                | 0.238              |
| <b>A/Memphis/257/2019</b>                                  |  | <b>3'-SLN Ligand</b> |                    | <b>6'-SLN Ligand</b> |                    |
| <b>Polymer Concentration (µg)</b>                          |  | <b>Replicate 1</b>   | <b>Replicate 2</b> | <b>Replicate 1</b>   | <b>Replicate 2</b> |
| 0.15625                                                    |  | 0.068                | 0.072              | 0.071                | 0.078              |
| 0.3125                                                     |  | 0.073                | 0.067              | 0.087                | 0.088              |
| 0.625                                                      |  | 0.095                | 0.117              | 0.125                | 0.117              |
| 1.25                                                       |  | 0.122                | 0.13               | 0.216                | 0.182              |
| 2.5                                                        |  | 0.161                | 0.149              | 0.246                | 0.257              |
| 5                                                          |  | 0.188                | 0.183              | 0.38                 | 0.361              |
| 10                                                         |  | 0.233                | 0.23               | 0.667                | 0.667              |
